# Supplementary material for: Blinded predictions of distribution coefficients in the SAMPL5 challenge
Source: PubMed Central journal article supplement (PMC5206288; doi:10.1007/s10822-016-9969-1), 2016-09-27
Supplement: 10822_2016_9969_MOESM1_ESM.pdf [file 10822_2016_9969_MOESM1_ESM.pdf]

# Supplementary Information

## SAMPL5: Distribution Coefficient Predictions with SOMD

S. Bosisio, A. S.J.S. Mey, J. Michel

August 23, 2016

### Datasets

Fig. 1 shows the dataset extracted from the Minnesota Database [1]. The dataset was chosen in order to simulate the most typical moieties present in the SAMPL5 batch.

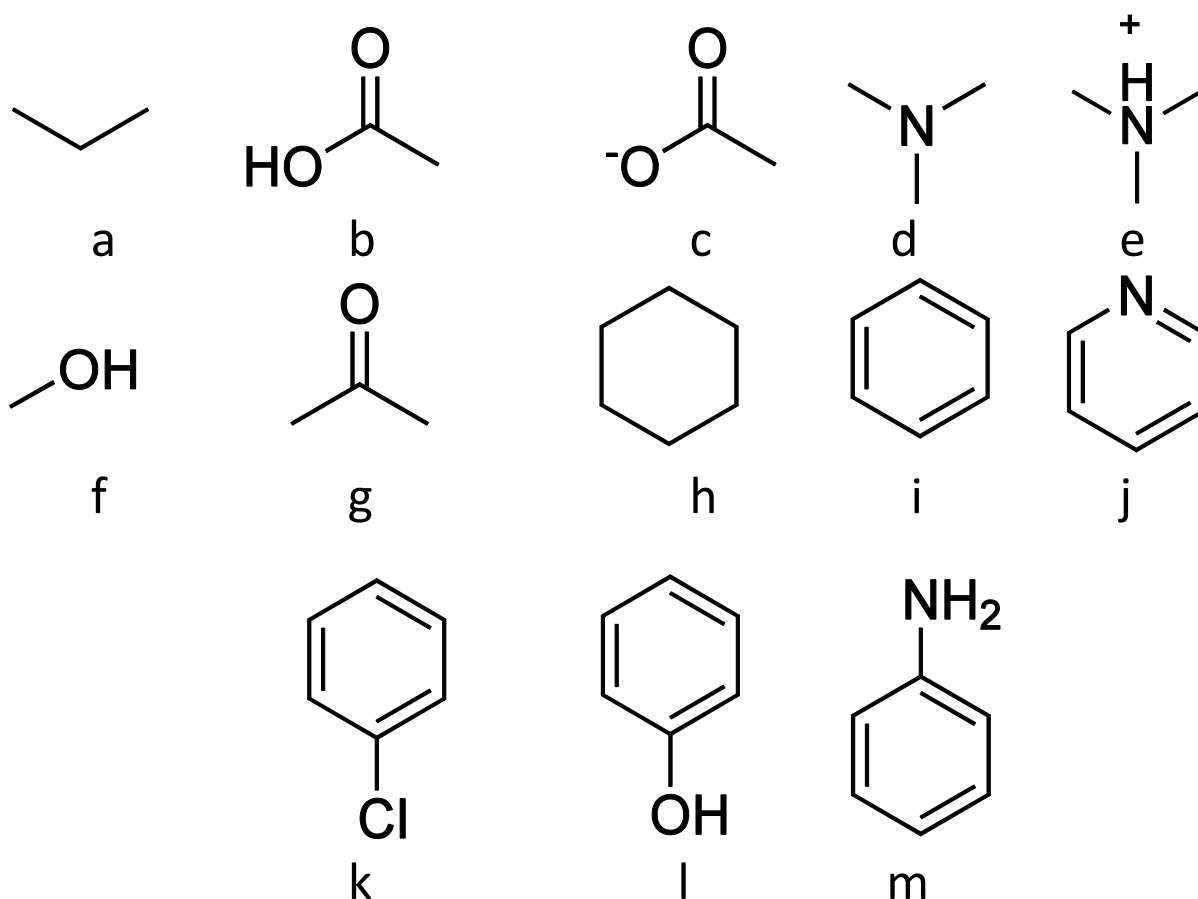

Figure 1: Dataset of molecules selected from the Minnesota Database [1]: a) n-propane, b) acetic acid c) acetate d) trimethylamine e) trimethylammonium f) methanol g) acetone h) cyclohexane i) benzene j) pyridine k) chlorobenzene l) phenol m) aniline

SAMPL5\_058

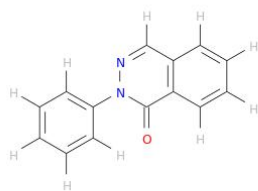

SAMPL5\_020

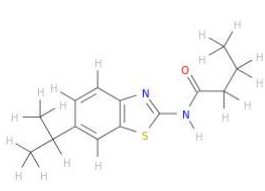

SAMPL5\_045

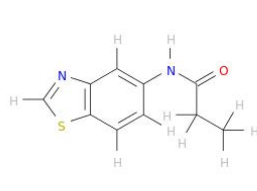

SAMPL5\_059

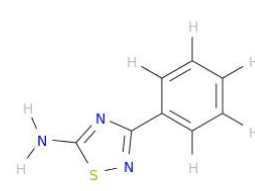

SAMPL5\_080

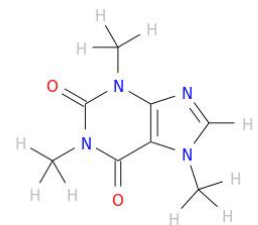

SAMPL5\_055

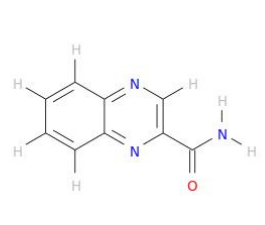

SAMPL5\_037

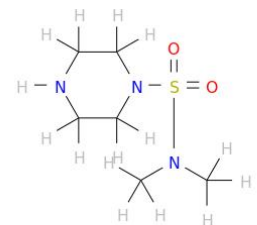

SAMPL5\_061

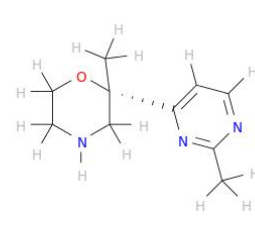

SAMPL5\_068

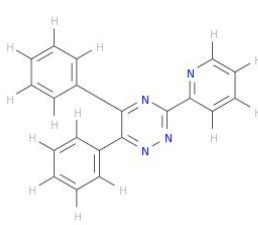

SAMPL5\_003

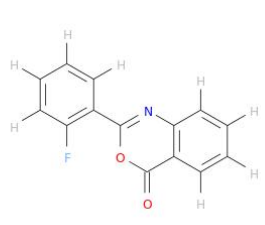

SAMPL5\_070

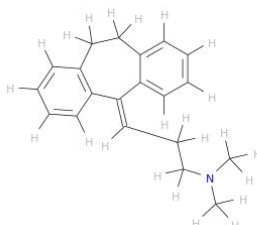

SAMPL5\_015

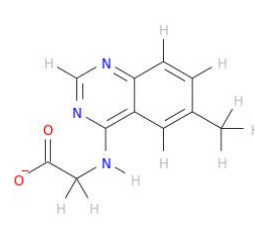

SAMPL5\_017

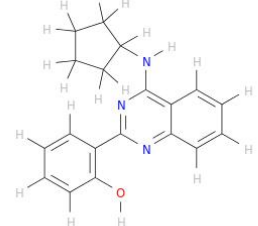

(a) SAMPL5 distribution coefficient molecules of batch 0

Fig. 2a, 2b, 2c show the 53 molecules of SAMPL5 dataset divided in batch 0, batch 1 and batch 2

SAMPL5\_063

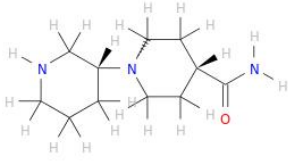

SAMPL5\_071

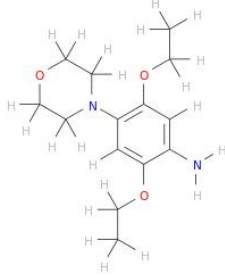

SAMPL5\_072

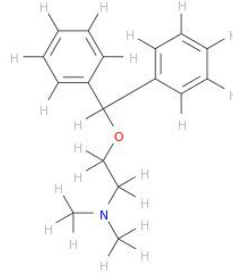

SAMPL5\_011

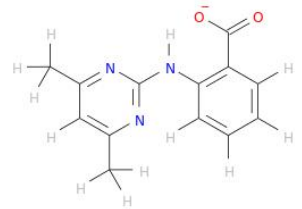

SAMPL5\_027

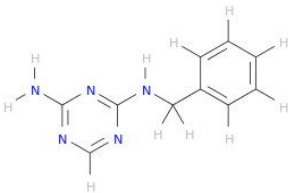

SAMPL5\_056

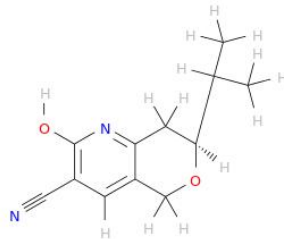

SAMPL5\_047

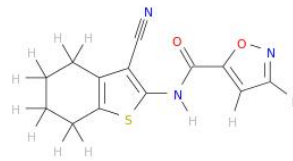

SAMPL5\_005

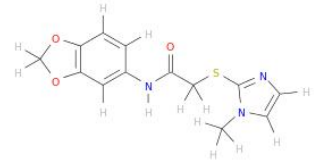

SAMPL5\_090

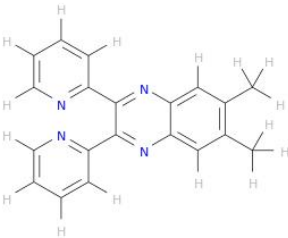

SAMPL5\_021

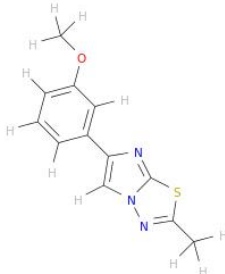

SAMPL5\_004

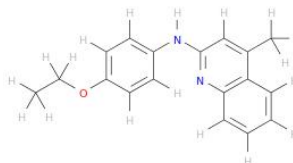

SAMPL5\_081

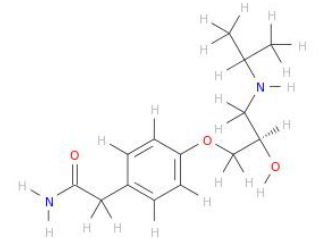

SAMPL5\_007

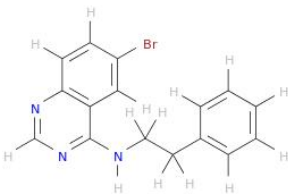

SAMPL5\_042

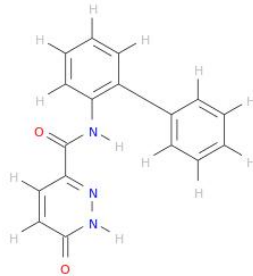

SAMPL5\_010

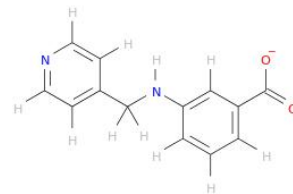

SAMPL5\_048

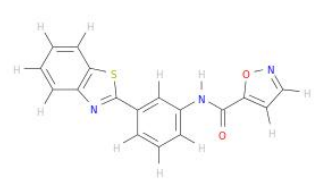

(b) SAMPL5 distribution coefficient molecules of batch 1

SAMPL5\_019

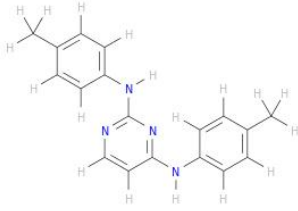

SAMPL5\_086

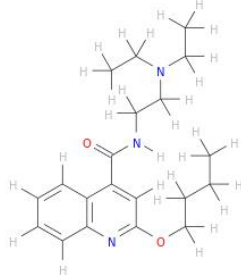

SAMPL5\_049

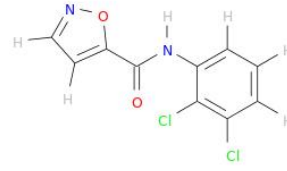

SAMPL5\_088

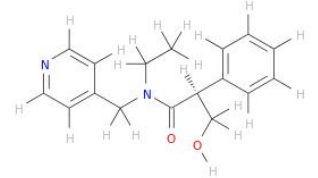

SAMPL5\_024

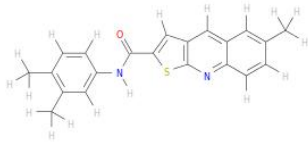

SAMPL5\_074

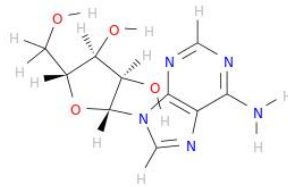

SAMPL5\_050

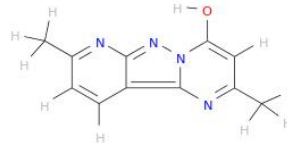

SAMPL5\_085

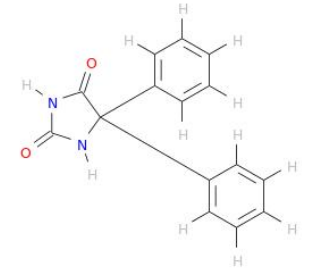

SAMPL5\_067

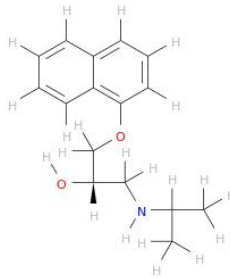

SAMPL5\_069

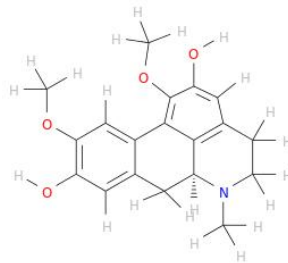

SAMPL5\_013

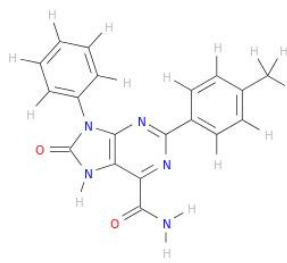

SAMPL5\_092

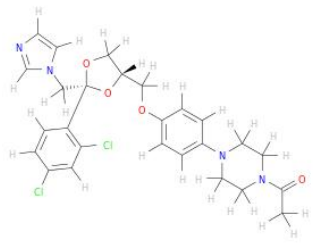

SAMPL5\_083

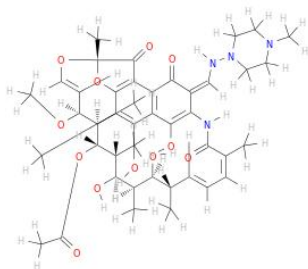

SAMPL5\_075

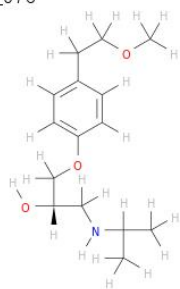

SAMPL5\_002

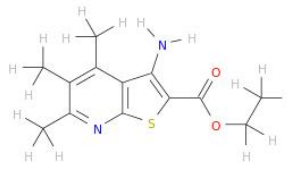

SAMPL5\_084

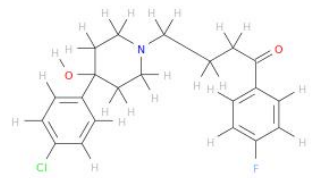

(c) SAMPL5 distribution coefficient molecules of batch 2

Chemical structures for the charged species are represented in fig. 3

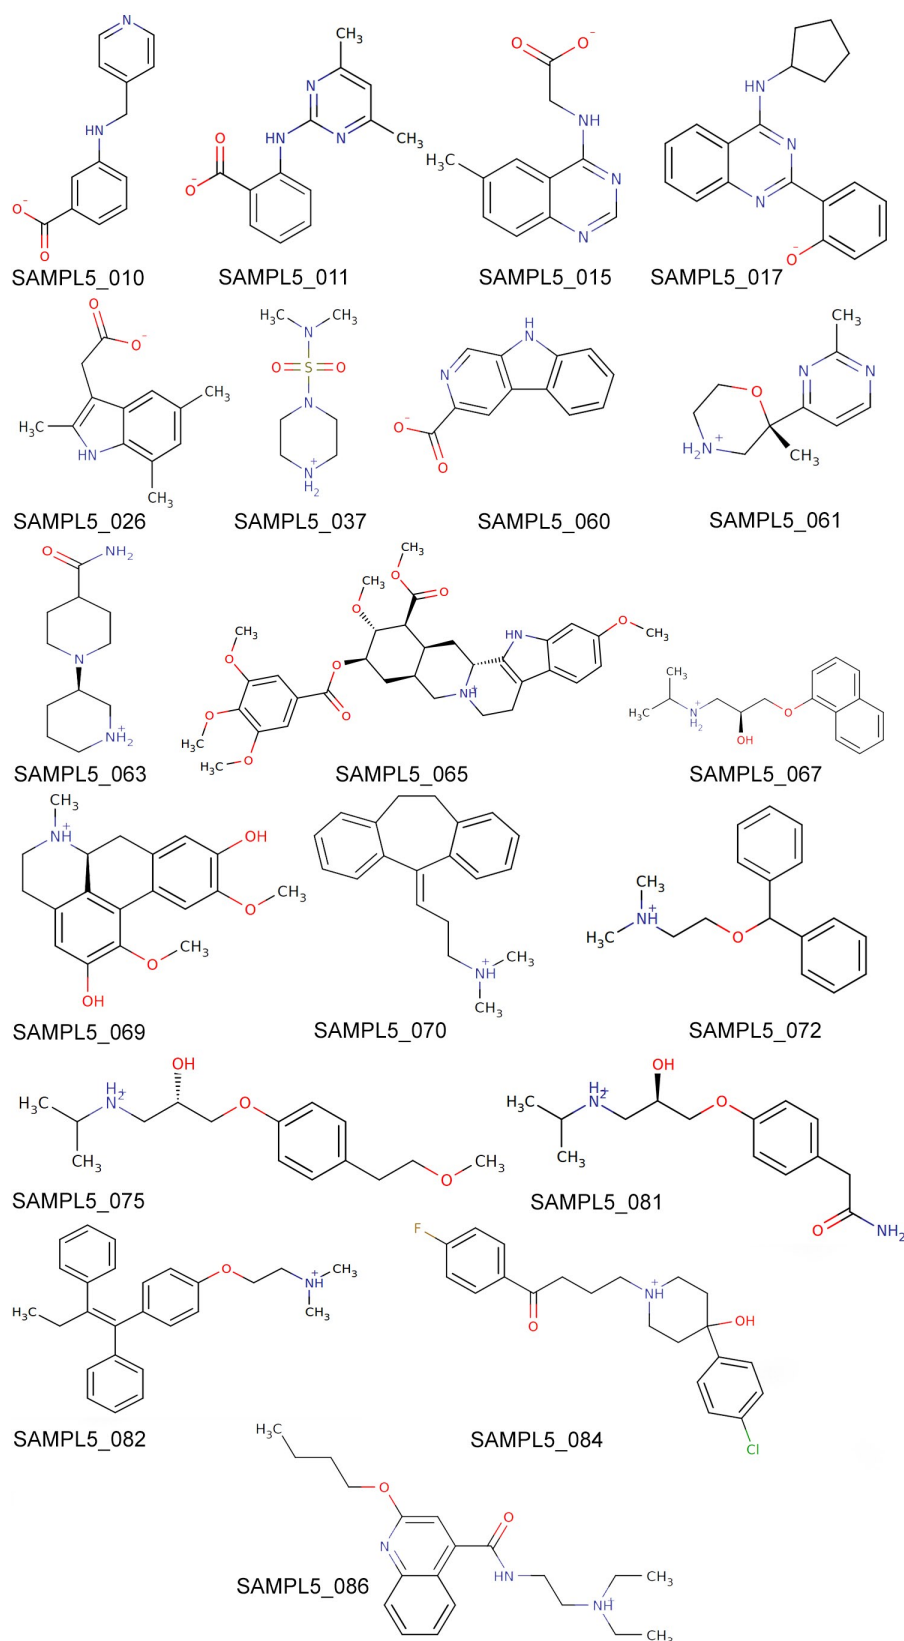

Figure 3: Chemical structure for the compounds modeled as charged

## Statistical analysis of the different models

The statistical significance of *model A, B, C* and *D* of the **dominant-species model** is shown in fig. 4. Overlap between notches is present in *model A* and *B*, denoting a similar behavior in  $\log D$  estimations. *Model C* is the less statistical significant with the lowest  $R^2$  and  $\tau$  and highest MUE.

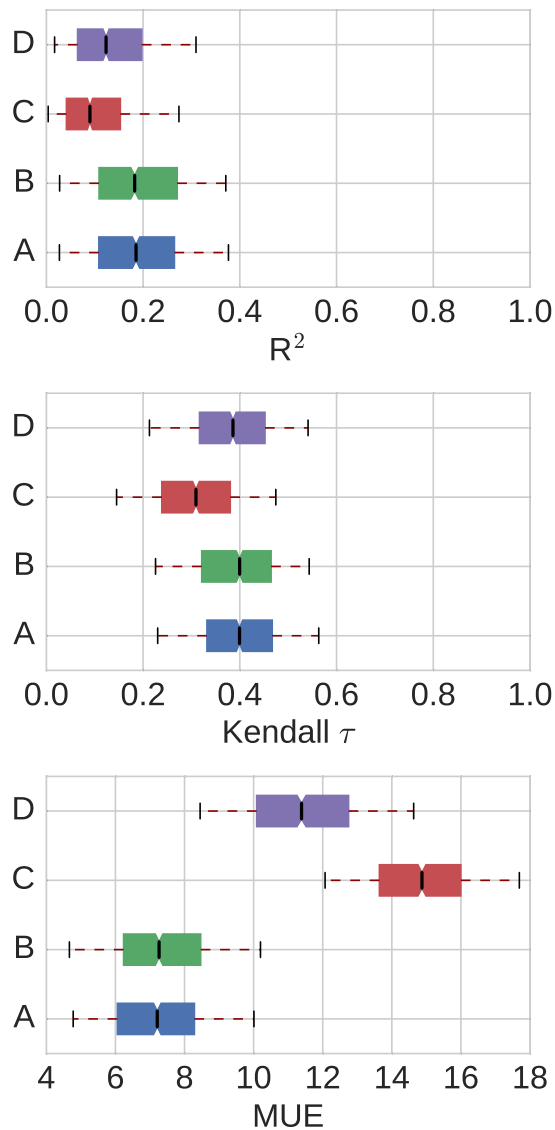

Figure 4: Comparison of determination coefficient  $R^2$  (top), Kendall  $\tau$  (middle) and mean unsigned error (MUE) (bottom), between *model A, B, C* and *D* for  $\log D$  estimation with **dominant-species model**. Results show in box plot form with the 5th 95th percentile, the median and the notch.

Results are improved if the **two-species model** is adopted and statistical significance of *model A, B, C* and *D* is shown in fig. 5

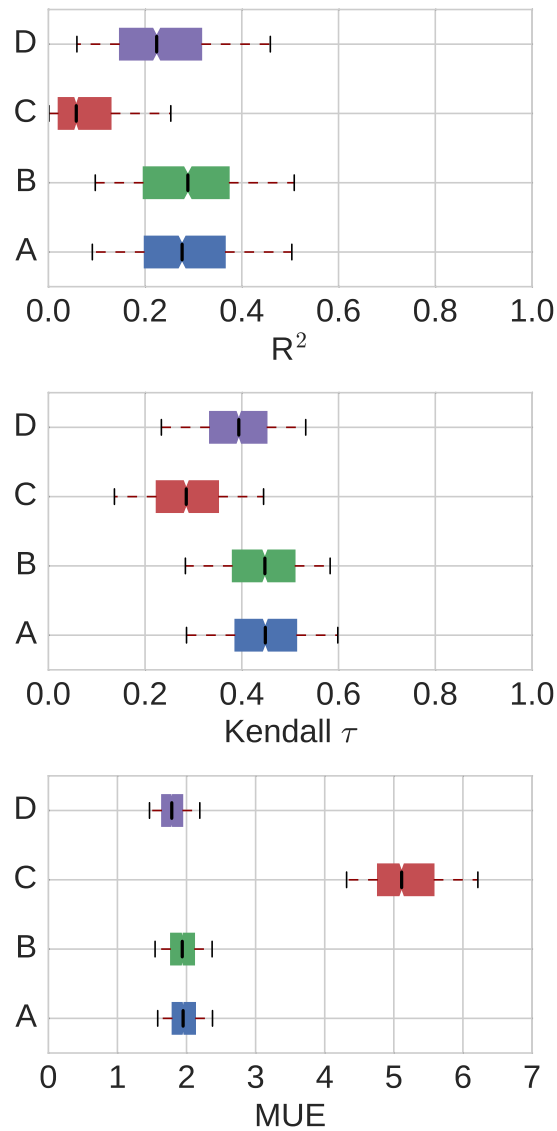

Figure 5: Comparison of determination coefficient  $R^2$  (top), Kendall  $\tau$  (middle) and mean unsigned error (MUE) (bottom), between *model A, B, C* and *D* for  $\log D$  estimation with **two-species model**. Results show in box plot form with the 5th 95th percentile, the median and the notch.

The archive dominant\_species.zip contains:

- logD folder: the predicted  $\log D$  are stored into csv files along with the standard error for *model A* (A.csv), *B* (B.csv), *C* (C.csv) and *D* (D.csv)
- solv\_energies folder: this folder contains the solvation free energies for each model and standard error for cyclohexane (cyclohexane\_solv.csv) and hydration free energies (water\_solv.csv)

The archive two\_species.zip contains:

- Comparison\_methods.csv : a comparison between two species equation (eq.19) and eq.20 [2] to test the efficacy of the effective pKa assumption
- Concentration.csv: the concentration used to calculate the  $\log D$  with eq.19, retrieved from ChemAxon [3]
- logD\_charged.csv: the predicted  $\log D$  for each charged species according to *model A*, *B*, *C* and *D* for the two species approach
- pKa.csv: the pKa used to calculate the  $\log D$  with eq.19, retrieved from ChemAxon [3]

## References

- [1] Aleksandr V. Marenich, Casey P. Kelly, Jason D. Thompson, Gregory D. Hawkins, Candee C. Chambers, David J. Giesen, Paul Winget, Christopher J. Cramer, and Donald G. Truhlar. *University of Minnesota, Minneapolis*, 2009.
- [2] Robert A. Scherrer, Susan M. Howard, *J. Med. Chem.*, 1977, 20(1), 53-58
- [3] Chemaxon, [www.chemicalize.org](http://www.chemicalize.org).
